# Supplementary material
Source: PubMed Central journal article supplement (PMC6129415)
Supplement: NIHMS979040-supplement-1.pdf [file NIHMS979040-supplement-1.pdf]

**Supplemental Table 1.** Composition of AIN-93G-based exosome and RNA-depleted (ERD) and exosome and RNA-sufficient (ERS) diets.<sup>1</sup>

| <b>ERD</b>                                       | <b>ERS</b>                             | <b>g/kg</b> |
|--------------------------------------------------|----------------------------------------|-------------|
| Cornstarch                                       | Cornstarch                             | 330         |
| Soy Protein                                      | Soy Protein                            | 163         |
| Dextrinized cornstarch                           | Dextrinized cornstarch                 | 132         |
| Milk Powder (sonicated exosomes),<br>~5% lactose | Milk Powder (exosomes),<br>~5% lactose | 105         |
| Sucrose                                          | Sucrose                                | 100         |
| Soybean oil (no additives)                       | Soybean oil (no additives)             | 70          |
| Fiber                                            | Fiber                                  | 50          |
| Mineral mix (AIN-93G-MX)                         | Mineral mix (AIN-93G-MX)               | 35          |
| Vitamin mix (AIN-93-VX)                          | Vitamin mix (AIN-93-VX)                | 10          |
| L-Cystine                                        | L-Cystine                              | 3           |
| Choline bitartrate (41.1% choline)               | Choline bitartrate (41.1% choline)     | 2.5         |
| Tert-butylhydroquinone                           | Tert-butylhydroquinone                 | 0.014       |

<sup>1</sup>Abbreviation: AIN-93G, American Institute of Nutrition growth diet; MX, mineral mixture; VX, vitamin mixture.

**Supplemental Table 2.** Multiple reaction monitoring transitions and parameters used in this study. Transitions were taken from Yuan et al. [28].<sup>1</sup>

| <b>Amino acid</b>  | <b>Ionization mode</b> | <b>Q1<sup>1</sup></b> | <b>Q3</b> | <b>Dwell time (s)</b> | <b>Collision energy (eV)</b> |
|--------------------|------------------------|-----------------------|-----------|-----------------------|------------------------------|
| Alanine            | +                      | 90.1                  | 44.2      | 3                     | 13                           |
| Arginine           | +                      | 175.0                 | 60.0      | 3                     | 16                           |
| Asparagine         | +                      | 133.1                 | 74.0      | 3                     | 19                           |
| Aspartate          | +                      | 134.0                 | 74.0      | 3                     | 17                           |
| Cysteine           | +                      | 122.1                 | 59.1      | 3                     | 29                           |
| Glutamine          | +                      | 147.1                 | 84.1      | 3                     | 17                           |
| Glutamate          | +                      | 148.1                 | 84.1      | 3                     | 17                           |
| Glycine            | +                      | 76.1                  | 30.5      | 3                     | 18                           |
| Histidine          | +                      | 156.1                 | 110.1     | 3                     | 14                           |
| Leucine/Isoleucine | +                      | 132.1                 | 86.0      | 3                     | 13                           |
| Lysine             | +                      | 147.0                 | 67.0      | 3                     | 32                           |
| Methionine         | +                      | 150.1                 | 133.0     | 3                     | 12                           |
| Phenylalanine      | +                      | 166.1                 | 103.0     | 3                     | 30                           |
| Proline            | +                      | 116.1                 | 70.1      | 3                     | 13                           |
| Serine             | +                      | 106.0                 | 60.0      | 3                     | 15                           |
| Threonine          | +                      | 120.0                 | 74.0      | 3                     | 13                           |
| Tryptophan         | +                      | 205.0                 | 146.0     | 3                     | 18                           |
| Tyrosine           | +                      | 182.1                 | 77.0      | 3                     | 39                           |
| Valine             | +                      | 118.1                 | 55.2      | 3                     | 13                           |

<sup>1</sup>Abbreviations: Q1, precursor ion mass; Q2, product ion mass.

**Supplemental Table 3.** Primers used in RT-qPCR analysis.<sup>1</sup>

| <b>mRNA</b> | <b>GenBank<br/>accession no.</b> | <b>Primers (5'-3')</b>                              | <b>Product size<br/>(bp)</b> |
|-------------|----------------------------------|-----------------------------------------------------|------------------------------|
| Socs2       | NM_007706                        | F: GCAGCCTTACTTCAGACACA<br>R: GCACCTGTATAGCGTGACAT  | 99                           |
| Il6ra       | NM_010559                        | F: CCAACCCGCTGTTTCCTATAA<br>R: AGTGTTACAGGCTCATTCC  | 124                          |
| Rhobtb1     | NM_001081347                     | F: TGAACCAGGAGATCACGAAAG<br>R: GCTCCGTCATCCAAGGTAAG | 109                          |
| Tmem100     | NM_026433                        | F: GTTTAGGGAGTGTGGGAGATG<br>R: CTTGCCAGGGCTCTCATTAT | 99                           |
| GAPDH       | NM_001289726                     | F: CATGGCCTTCCGTGTTCCCTA<br>R: GCGGCACGTCAGATCCA    | 55                           |

<sup>1</sup>Abbreviations: F, forward; R, reverse.

**Supplemental Table 4.** Normal ranges of variables of liver and kidney function in the serum of C57BL/6 mice.<sup>1</sup>

| <b>Variable</b>             | <b>Normal range</b> |
|-----------------------------|---------------------|
| Calcium                     | 5.9 - 9.4 mg/dl     |
| Total protein               | 3.6 – 6.6 g/dl      |
| Albumin                     | 2.5 – 4.8 g/dl      |
| Alanine<br>aminotransferase | 28 - 132 U/l        |
| Blood urea nitrogen         | 18 - 29 mg/dl       |
| Creatinine                  | 0.2 – 0.8 mg/dl     |

<sup>1</sup>Abbreviation: U, enzyme activity.

**Supplemental Table 5.** Expected counts of differentially expressed genes ( $\geq 2$ -fold change) in ERD vs. ERS males and females (n=3).

| <b>Gene</b>    | <b>ERD-1</b> | <b>ERD-2</b> | <b>ERD-3</b> | <b>ERS-1</b> | <b>ERS-2</b> | <b>ERS-3</b> |
|----------------|--------------|--------------|--------------|--------------|--------------|--------------|
| <b>Females</b> |              |              |              |              |              |              |
| Rhobtb1        | 632          | 748          | 605          | 1509         | 1597         | 1268         |
| Socs2          | 287          | 316          | 508          | 1061         | 1204         | 932          |
| Lsm7           | 83           | 55           | 150          | 260          | 244          | 198          |
| Rps27rt        | 474          | 433          | 256          | 162          | 178          | 100          |
| Rpl28          | 0            | 35           | 54           | 0            | 0            | 0            |
| Gm10221        | 737          | 1620         | 0            | 0            | 0            | 0            |
| Tmem100        | 426          | 335          | 406          | 145          | 185          | 141          |
| Csf2rb2        | 30           | 42           | 33           | 61           | 87           | 64           |
| Gm10501        | 12           | 0            | 10           | 55           | 32           | 37           |
| Gm826          | 40           | 47           | 31           | 17           | 5.6          | 19           |
| Gm17971        | 2.2          | 3.9          | 3.7          | 18           | 30           | 19           |
| Rpl36a         | 407          | 173          | 0            | 0            | 0            | 30           |
| <b>Males</b>   |              |              |              |              |              |              |
| Ahsg           | 2.1          | 0            | 0            | 95           | 0            | 13           |
| Glcc1          | 30           | 36           | 15           | 0            | 2.6          | 4.0          |
| Fabp1          | 2.1          | 0            | 0            | 88           | 2.1          | 18           |
| Rpl31          | 0            | 9.2          | 0            | 0            | 420          | 121          |
| Gm14440        | 0            | 0            | 0            | 51           | 137          | 41           |
| Gm20431        | 22           | 79           | 118          | 0            | 0            | 0            |
| Gm5601         | 0            | 0            | 0            | 0            | 45           | 38           |
| RP23           | 7.2          | 9.3          | 3.7          | 34           | 16           | 26           |
| Umad1          | 17           | 0            | 1.5          | 52           | 40           | 38           |
